# Supplementary material for: Practical room temperature formaldehyde sensing based on a combination of visible-light activation and dipole modification
Source: Royal Society of Chemistry journal article supplement (doi:10.1039/d1ta06346d), 2021-01-01
Supplement: d1ta06346d1.pdf [file d1ta06346d1.pdf]

## *Supporting Information*

# **Practical room temperature formaldehyde sensing based on combination of visible-light activation and dipole modification**

*Hongping Liang<sup>1, 2</sup>, Lanpeng Guo<sup>1, 2</sup>, Nengjie Cao<sup>1, 2</sup>, Huiyun Hu<sup>1, 2</sup>, Hao Li<sup>1,2</sup>, Nicolaas Frans de Rooij<sup>2</sup>, Ahmad Umar<sup>3</sup>, Hamed Algarni<sup>4</sup>, Yao Wang<sup>1, 2,\*</sup> and Guofu Zhou<sup>1, 2</sup>*

*<sup>1</sup>Guangdong Provincial Key Laboratory of Optical Information Materials and Technology, Institute of Electronic Paper Displays, South China Academy of Advanced Optoelectronics, South China Normal University, Guangzhou, 510006, P. R. China.*

*<sup>2</sup>National Center for International Research on Green Optoelectronics, South China Normal University, Guangzhou, 510006, P. R. China.*

*<sup>3</sup>Promising Centre for Sensors and Electronic Devices, Department of Chemistry, Faculty of Science and Arts, Najran University, Najran, 11001, Kingdom of Saudi Arabia.*

*<sup>4</sup>Department of Physics, King Khalid University, Abha, 61421, Kingdom of Saudi Arabia.*

*\* Corresponding Author: Yao Wang, Email: [wangyao@m.scnu.edu.cn](mailto:wangyao@m.scnu.edu.cn)*

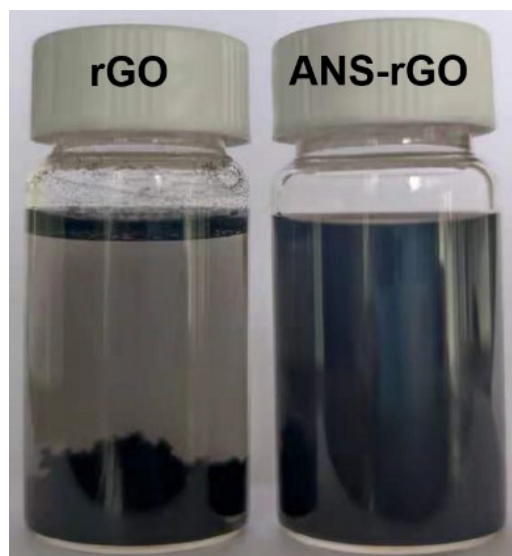

Figure S1. The photo pictures of pristine rGO and ANS-rGO water dispersions.

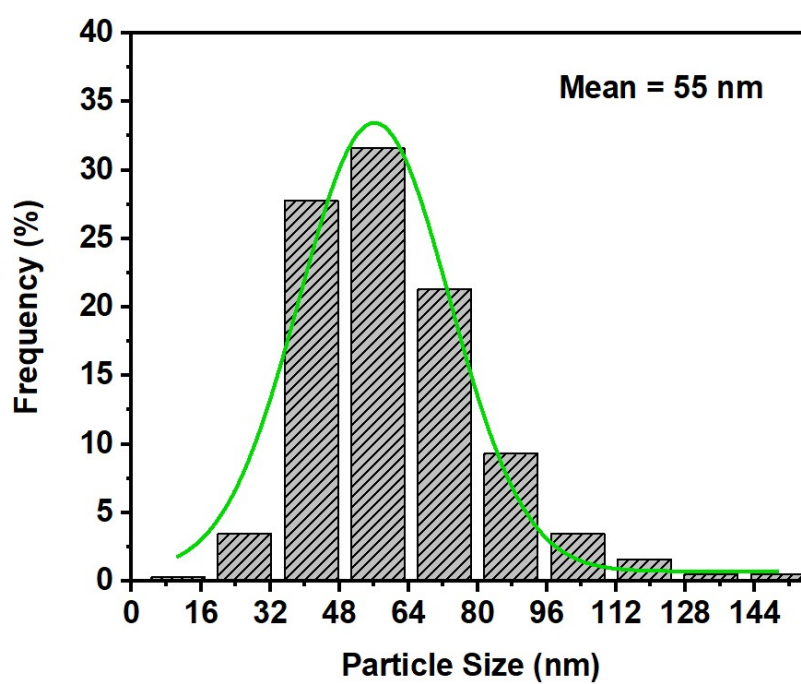

Figure S2. Particle size distribution of pure ZnO<sub>x</sub> nanoparticles.

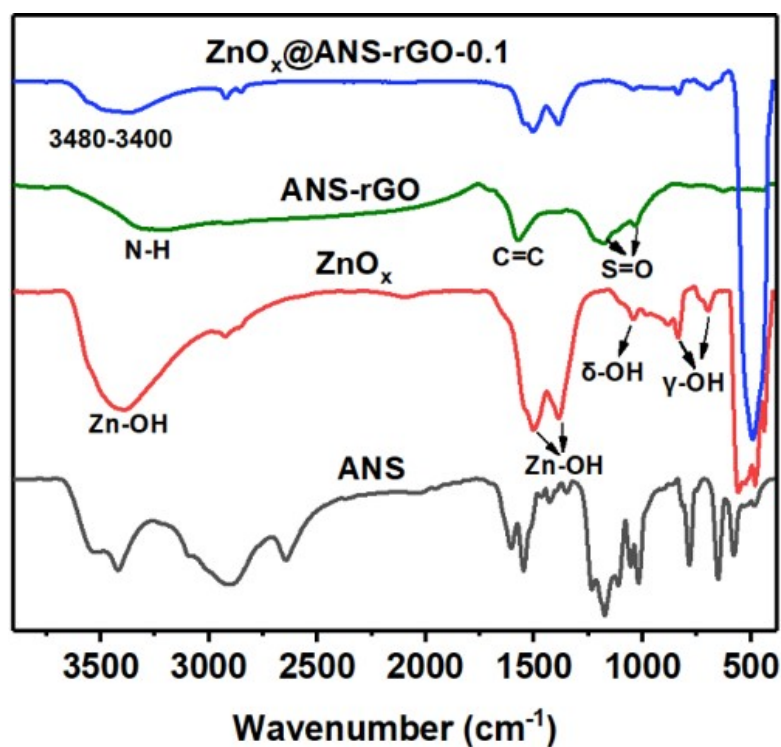

Figure S3. FTIR spectra of ANS,  $\text{ZnO}_x$ , ANS-rGO and  $\text{ZnO}_x\text{@ANS-rGO-0.1}$  nanocomposites.

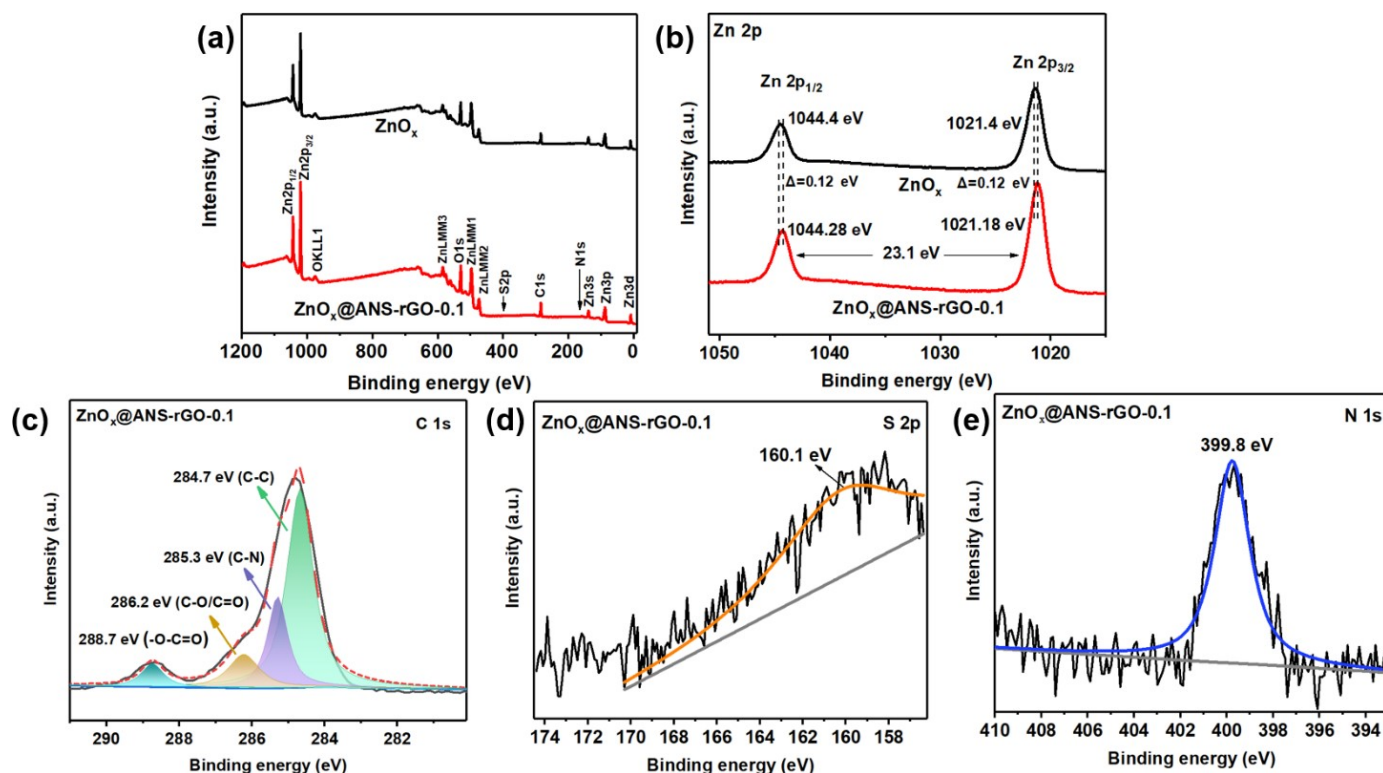

Figure S4. XPS survey spectra (a) of pure  $\text{ZnO}_x$  and  $\text{ZnO}_x\text{@ANS-rGO-0.1}$ ; Zn region (b) of pure  $\text{ZnO}_x$  and  $\text{ZnO}_x\text{@ANS-rGO-0.1}$ ; high-resolution spectra of C 1s (c), S 2p (d) and N 1s (e) in  $\text{ZnO}_x\text{@ANS-rGO-0.1}$ .

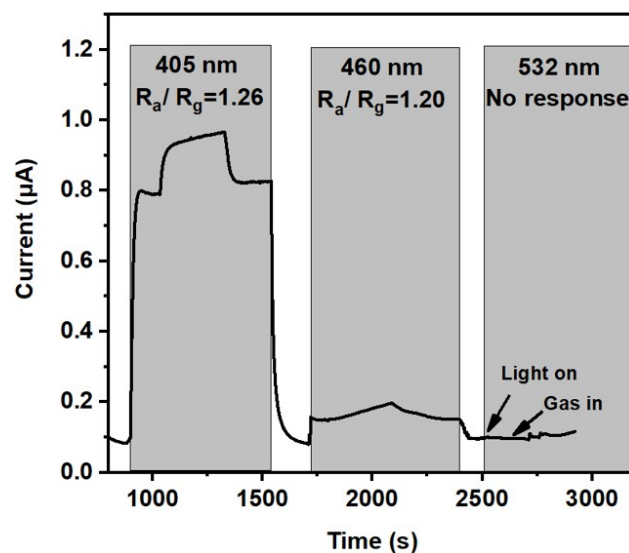

Figure S5. Typical response curve of 0.4 ppm HCHO under different wavelengths including 405, 460 and 532 nm visible light.

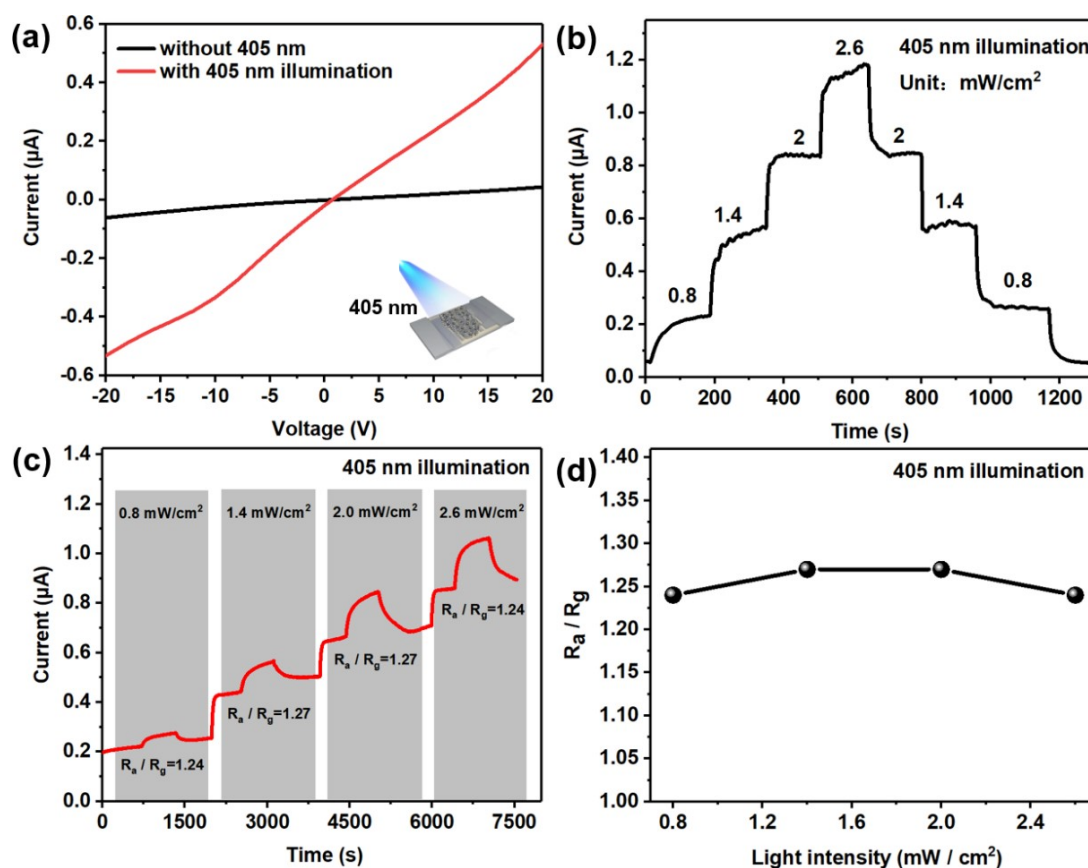

Figure S6. I-V characterizes (a) of ZnO<sub>x</sub>@ANS-rGO-0.1 based sensor under 405 nm illumination and dark condition; Reproducibility (b) of the sensor upon 405 nm illumination with different light intensity; Typical response curve (c) of 0.4 ppm HCHO under different 405 nm light intensity (0.8-2.6 mW/cm<sup>2</sup>) and its corresponding response value (d).

**Table S1** Comparison of the gas sensing performances for different samples

| Samples                        | S    | T <sub>res</sub> (s) | T <sub>rec</sub> (s) |
|--------------------------------|------|----------------------|----------------------|
| ANS-rGO@ZnO <sub>x</sub> -0.1  | 1.58 | 47                   | 39                   |
| NA-rGO@ZnO <sub>x</sub> -0.1   | 1.48 | 181                  | 65                   |
| ANS-rGO@ZnO <sub>x</sub> -0.01 | 1.37 | 87                   | 40                   |
| ANS-rGO@ZnO <sub>x</sub> -1    | 1.24 | 50                   | 23                   |
| rGO/ZnO <sub>x</sub> -0.1      | 1.18 | 156                  | 111                  |
| ZnO <sub>x</sub>               | 1.41 | 200                  | 77                   |
| ANS-rGO                        | -    | -                    | -                    |

Sensitivity (S), Response time (T<sub>res</sub>), Recovery time (T<sub>rec</sub>)

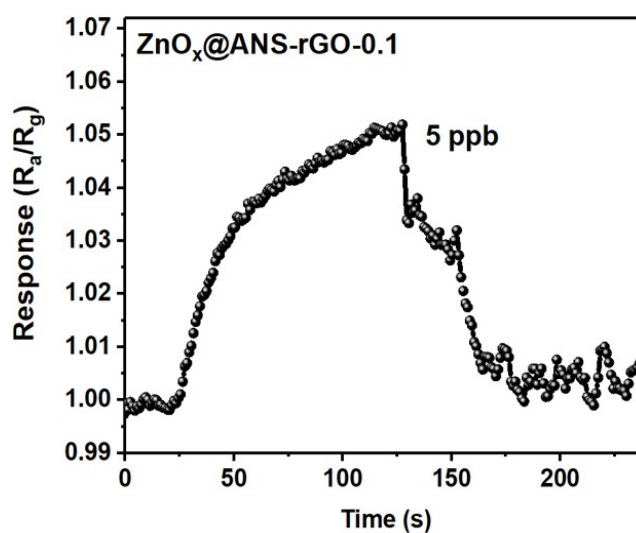

Figure S7. dynamic response of the ZnO<sub>x</sub>@ANS-rGO-0.1 based sensor toward 5 ppb HCHO under 405 nm illumination.

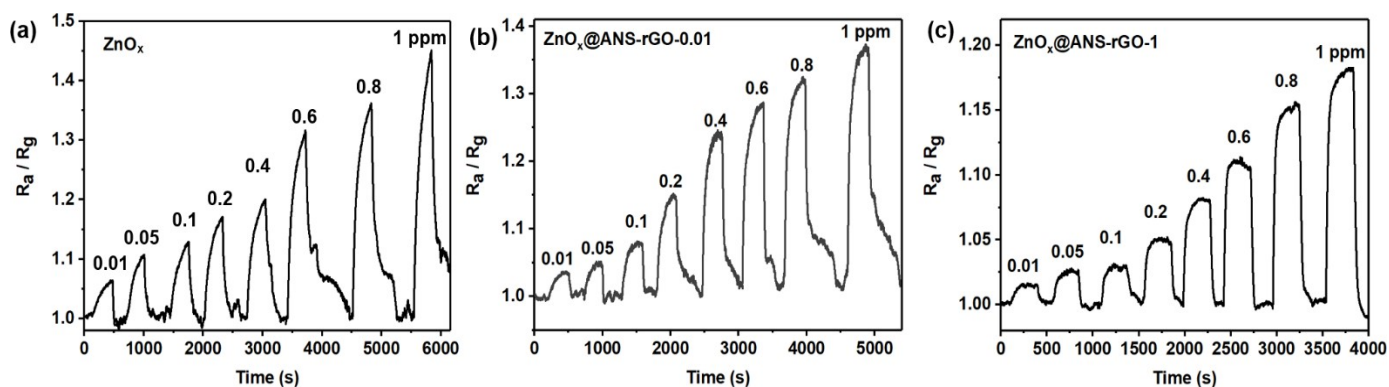

Figure S8. Response curves of ZnO<sub>x</sub> (a), ZnO<sub>x</sub>@ANS-rGO-0.01 (b) and ZnO<sub>x</sub>@ANS-rGO-1 (c) based sensors to HCHO at concentration vary from 0.01 ppm to 1 ppm under 405 nm visible light illumination.

**Table S2** Comparison of HCHO concentration detected by our sensor and ultraviolet spectrophotometer (calibration)

| Number | Our sensor (ppb) | Calibration (ppb) |
|--------|------------------|-------------------|
| 1      | 925              | 893               |
| 2      | 824              | 829               |
| 3      | 598              | 551               |
| 4      | 345              | 323               |
| 5      | 222              | 190               |

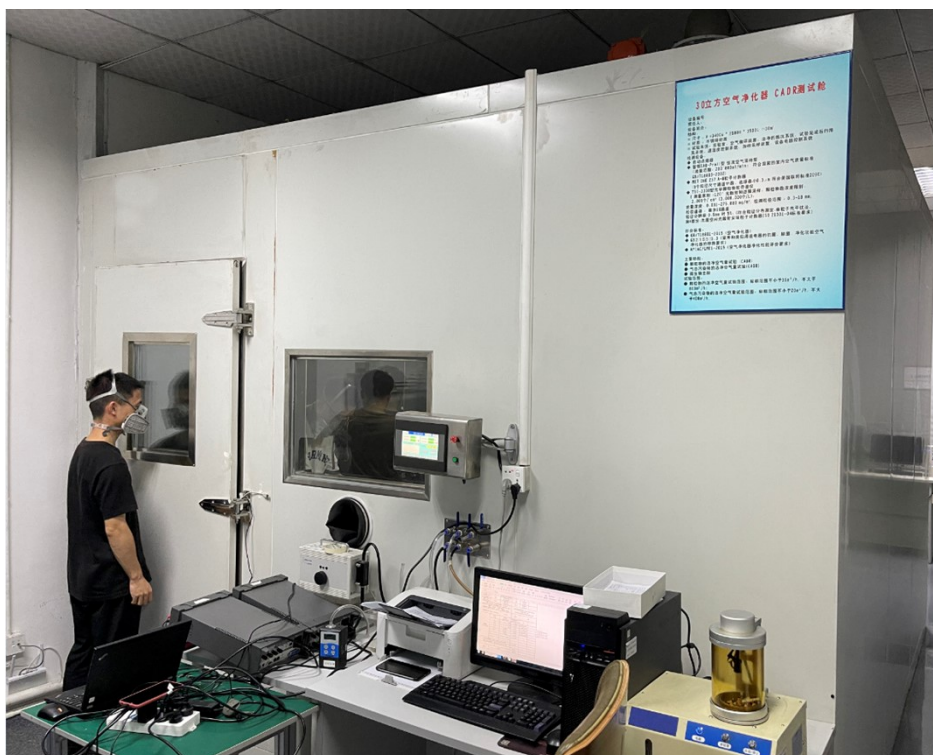Figure S9. Picture of a 30 m<sup>3</sup> test chamber we used in Guangdong Mixwell Technology Co., Ltd. for this work.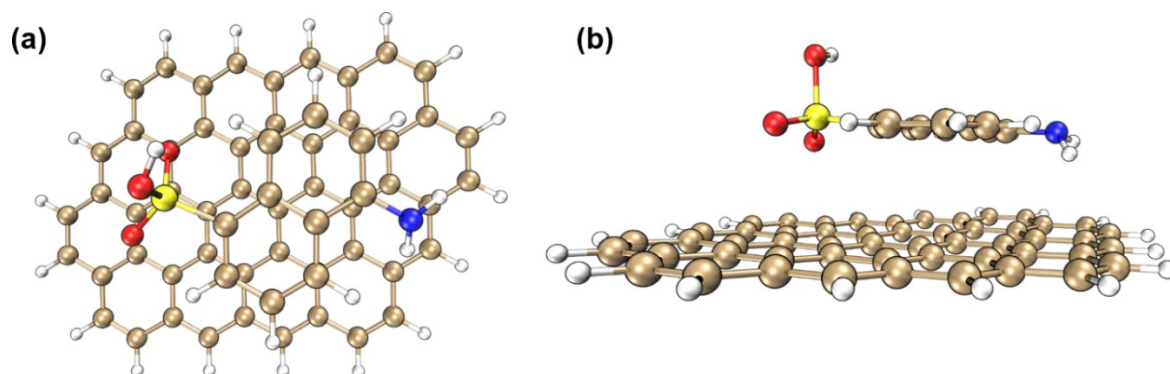

Figure S10. Optimized geometries of the ANS-rGO molecular structures: (a) vertical view; (b) front view. (The detailed simulation procedure is shown in the computational details part)
